# Supplementary material for: Introducing LAB60: A 1/60° NEMO 3.6 numerical simulation of the Labrador Sea
Source: Copernicus journal article supplement (doi:10.5194/gmd-2020-111), 2020-04-30
Supplement: Supplementary file 1 [file gmd-2020-111-supplement.pdf]

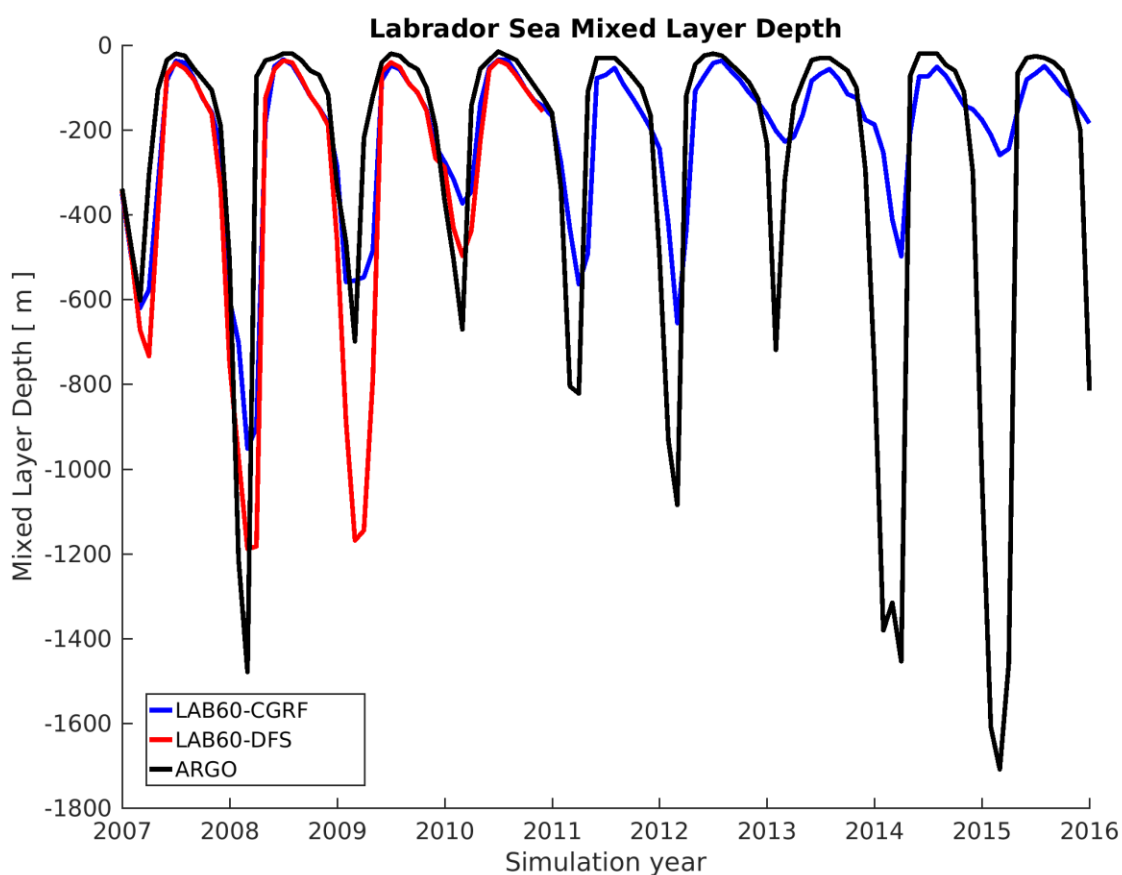

1  
 2 Supplemental Figure 1: Monthly mixed layer depth as determined by the LAB60-CGRF  
 3 simulation, the LAB60-DFS simulation, and ARGO observations from 2007 to the end of 2016.  
 4 This figure highlights the justification that the CGRF forcing was inadequate to force LAB60,  
 5 prompting us to restart the run in 2007 using the DFS forcing.

6  
 7 Supplemental Video 1: Relative vorticity of the LAB60 simulation, from 1 Jan 2004 through 31  
 8 Dec 2010. Units are in  $s^{-1}$ . Note a few days are missing due to corrupted output files. DOI:  
 9 <https://doi.org/10.7939/r3-2yts-nw62>

10  
 11 Supplemental Video 2: Convective energy of the LAB60 simulation, with a reference depth of  
 12 2000m. Video takes place from 1 Jan 2004 through 31 Dec 2010. Units are in  $J m^{-3}$ . Note a few  
 13 days are missing due to corrupted output files. DOI: <https://doi.org/10.7939/r3-nen0-g831>

14

15 Supplemental Video 3: Mixed layer depth, in meters, of the LAB60 simulation from 1 Jan 2004  
16 through 31 Dec 2010. Note a few days are missing due to corrupted output files. DOI:

17 <https://doi.org/10.7939/r3-m6rk-h867>

18

19 Supplemental Video 4: Greenland melt passive tracer, in meters, of the LAB60 simulation. Video  
20 takes place from 1 Jan 2004 through 31 Dec 2010. Note a few days are missing due to corrupted  
21 output files. DOI: <https://doi.org/10.7939/r3-43mg-db88>

22

23 Supplemental Video 5: Irminger water passive tracer, in meters, of the LAB60 simulation. Video  
24 takes place from 1 Jan 2004 through 31 Dec 2010. Note a few days are missing due to corrupted  
25 output files. DOI: <https://doi.org/10.7939/r3-zwkr-0w35>

26

27 Supplemental Video 6: Labrador Sea water tracer, in meters, of the LAB60 simulation. Video  
28 takes place from 1 Jan 2004 through 31 Dec 2010. Note a few days are missing due to corrupted  
29 output files. DOI: <https://doi.org/10.7939/r3-7295-ks15>

30
